# Supplementary figures and images for: Antioxidant and dual dose-dependent antigenotoxic and genotoxic properties of an ethanol extract of propolis
Source: Royal Society of Chemistry journal article supplement (doi:10.1039/c6ra04856k), 2016-01-01

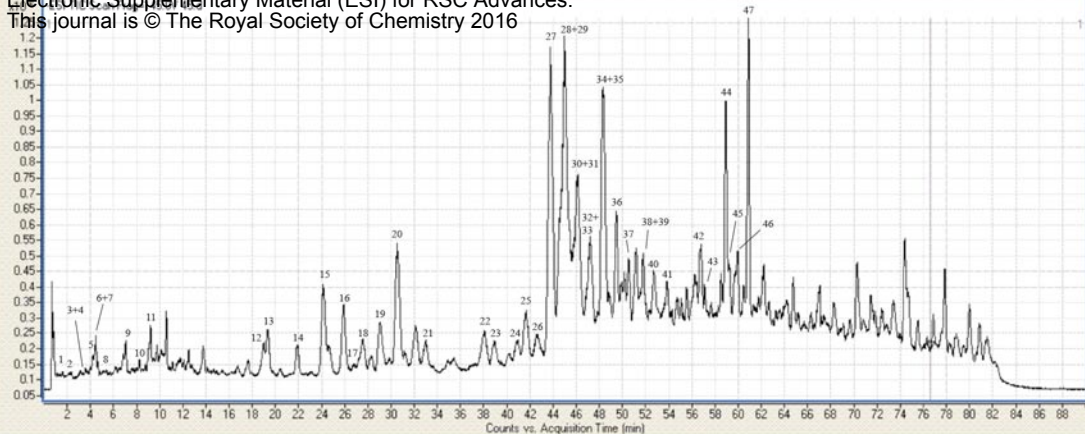

Supplement: c6ra04856k1.pdf [file c6ra04856k1.pdf]
